# Supplementary material
Source: publisher site journal article supplement (https://www.dovepress.com/get_supplementary_file.php?f=348519.docx)
Supplement: Supplementary file 1 [file get_supplementary_file.php]

**Supplementary methods**

Here is the formula for the IPTW modeling: Suppose there are n people in the analysis, where we have a matrix ***L*** indicating the adjusted variables, ***L*** *= [Age, Gender, Hypertension, Diabetes, Coronary heart disease, Neutrophils, Lymphocytes, D-Dimer, CRP, LMWH, Arbidol, Ribavirin, Interferon α-2b, Chinese medicine, Antibiotics],* and a vector ***x*** indicating the Low C3. In order to generate the stabilized weighting, we have

Using the stabilized weighting, we built a Cox model which took all the adjusting variables into consideration and can provide unbiased estimate under the correct model specification.

There are very mature statistical packages about IPW in the majority of the statistical language such as R which was used in this study.

**Supplementary Table 1 Clinical outcomes according to the 6-point ordinal scale**

| **Characteristic** | **Low C3 group** | **Control group** |
| --- | --- | --- |
| **(n=57)** | **(n=159)** |
| Clinical status at study baseline — no. of patients (%) |  |  |
| 2: Breathing ambient air without supplemental oxygen | 21 (36.8) | 52 (32.7) |
| 3: Receiving low-flow supplemental oxygen | 34 (59.6) | 104 (65.4) |
| 4: Requiring noninvasive mechanical ventilation or high-flow oxygen | 1 (1.8) | 3 (1.9) |
| 5: Requiring invasive ventilation or ECMO | 1 (1.8) | 0 |
| Clinical status at the end of follow-up — no. of patients (%) |  |  |
| 1: Discharge | 50 (87.7) | 155 (97.5) |
| 2: Hospitalized, breathing ambient air without supplemental oxygen | 0 | 0 |
| 3: Hospitalized, receiving low-flow supplemental oxygen | 0 | 0 |
| 4: Hospitalized, requiring noninvasive mechanical ventilation or high-flow oxygen | 2 (3.5) | 0 |
| 5: Hospitalized, requiring invasive ventilation or ECMO | 1 (1.8) | 0 |
| 6: Death | 4 (7.0) | 4 (2.5) |
| Clinical worsening during follow-up — no. of patients (%) a | 7 (12.3) | 4 (2.5) |

**Abbreviations**: ECMO, extracorporeal membrane oxygenation.

a Clinical worsening was defined as all-cause death during stay in hospital, or an increase of at least 2 points from baseline on a 6-point ordinal scale.


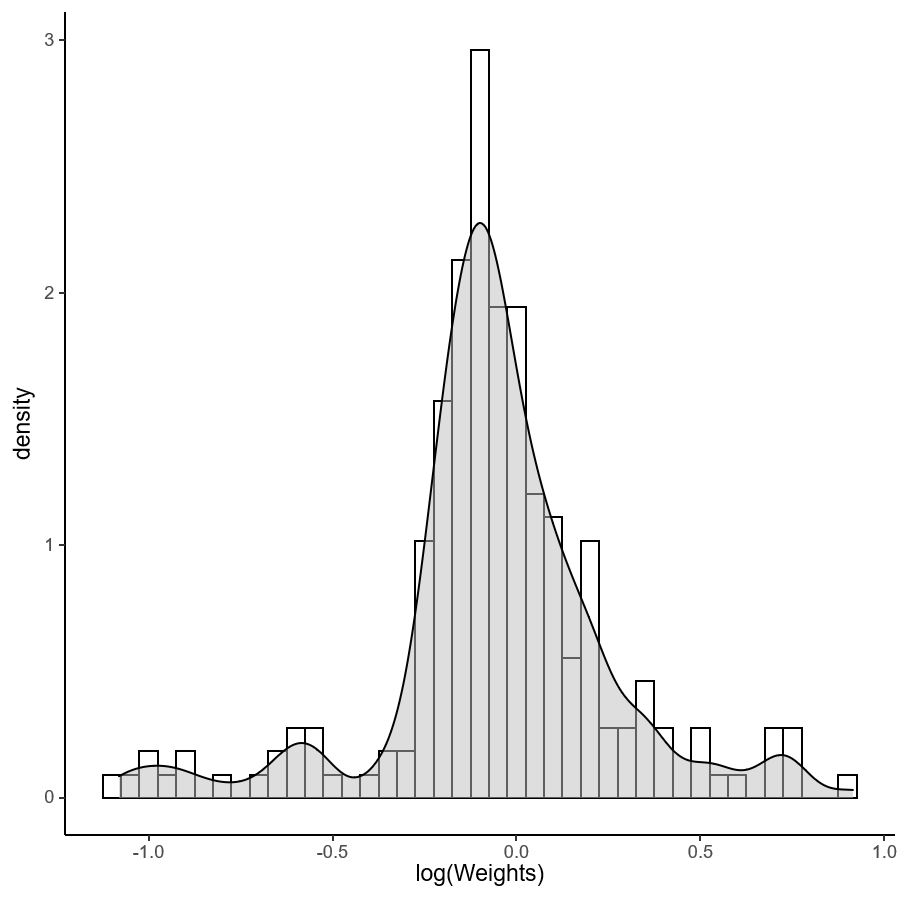


**Supplementary Figure 1: Distribution of weights in the inverse probability treatment weighting analysis for clinical worsening and overall survival.**


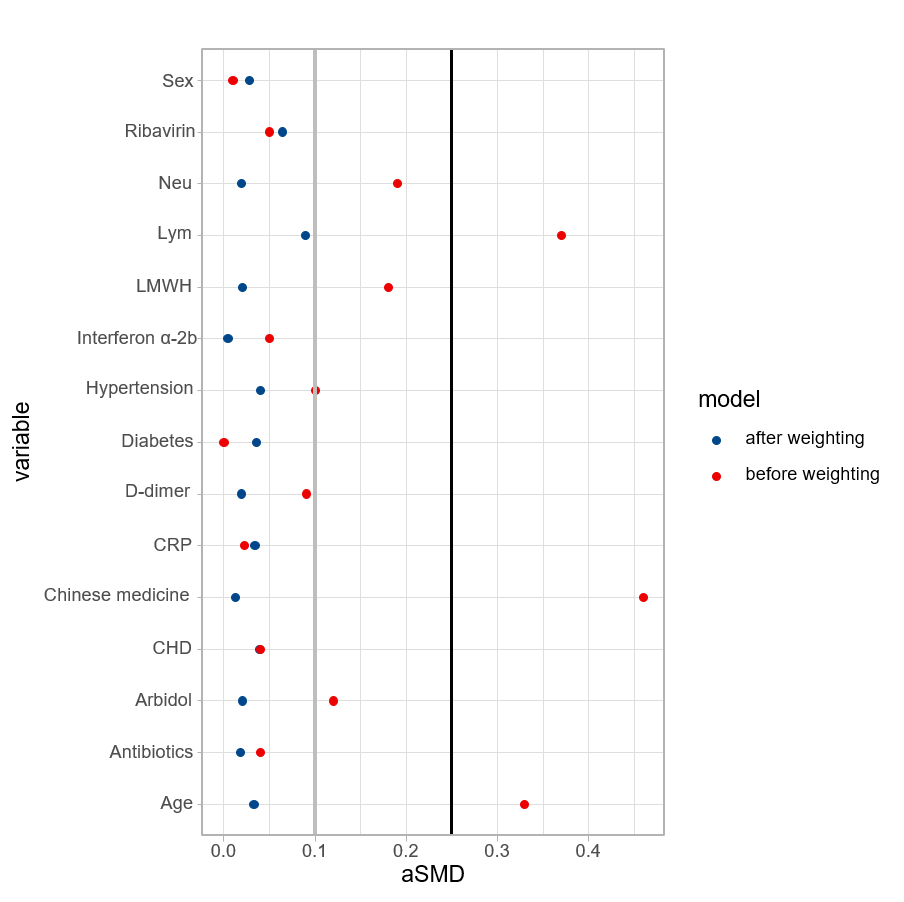


**Supplementary Figure 2: Absolute standardized mean differences (aSMD) of variables in the inverse probability treatment weighting analysis for clinical worsening and overall survival.** Neu, neutrophils; Lym, lymphocytes; LMWH, low molecular weight heparin; CRP, C-reactive protein; CHD, coronary heart disease.
